# Supplementary material for: A high quantum yield two-way conversion luminescent oligomer: 1,4-butanediol-bis(5-carbonyl-3-carbethoxy-2-pyrazoline)
Source: Royal Society of Chemistry journal article supplement (doi:10.1039/c6ra15007a), 2016-01-01
Supplement: c6ra15007a1.pdf [file c6ra15007a1.pdf]

A high-quantum-yield two-way conversion luminescent oligomer: 1, 4-  
butanediol-bis (5-carbonyl-3-carbethoxy-2-pyrazoline)

Cheng Chen, Yan Li, Lijian Liu\*

Key Laboratory of Biomedical Polymers, Ministry of Education, College of Chemistry and Molecular Sciences,  
Wuhan University, Wuhan, 430072, China.

Correspondence to: Lijian Liu (E-mail: [liulj@whu.edu.cn](mailto:liulj@whu.edu.cn))

Supporting Information

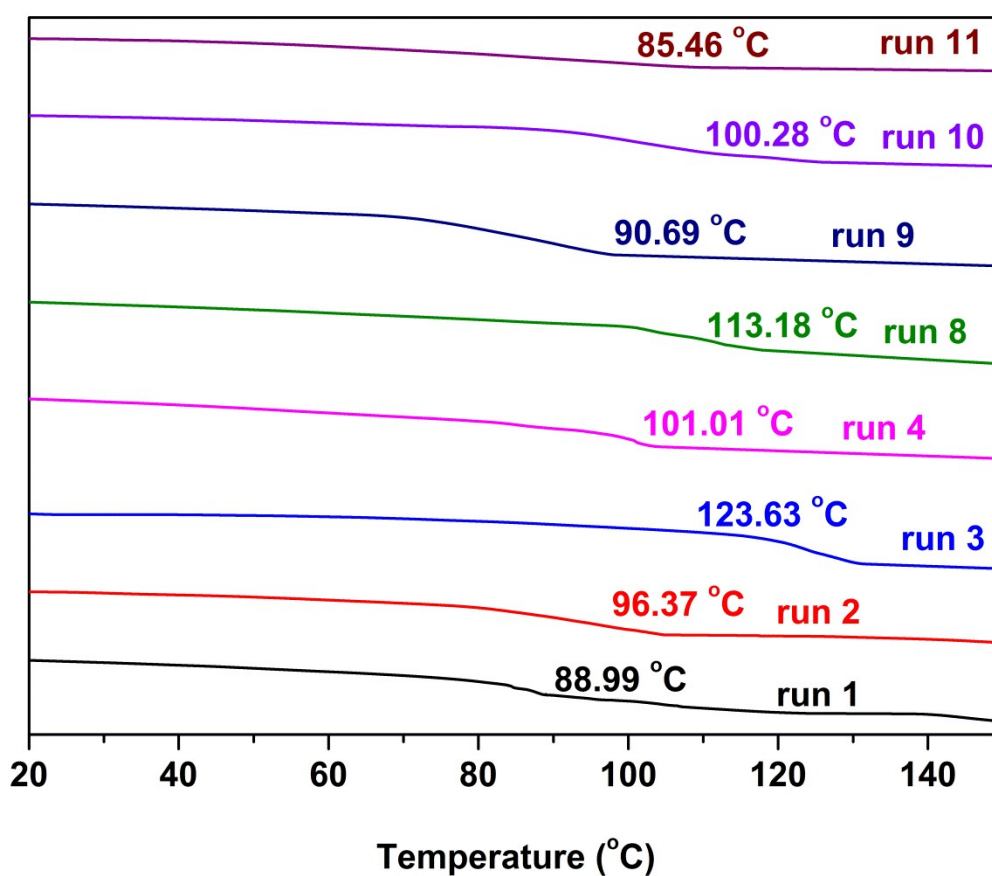

**Figure S1.** The differential scanning calorimetry (DSC) curves of the oligomers (run 1 to run 11).

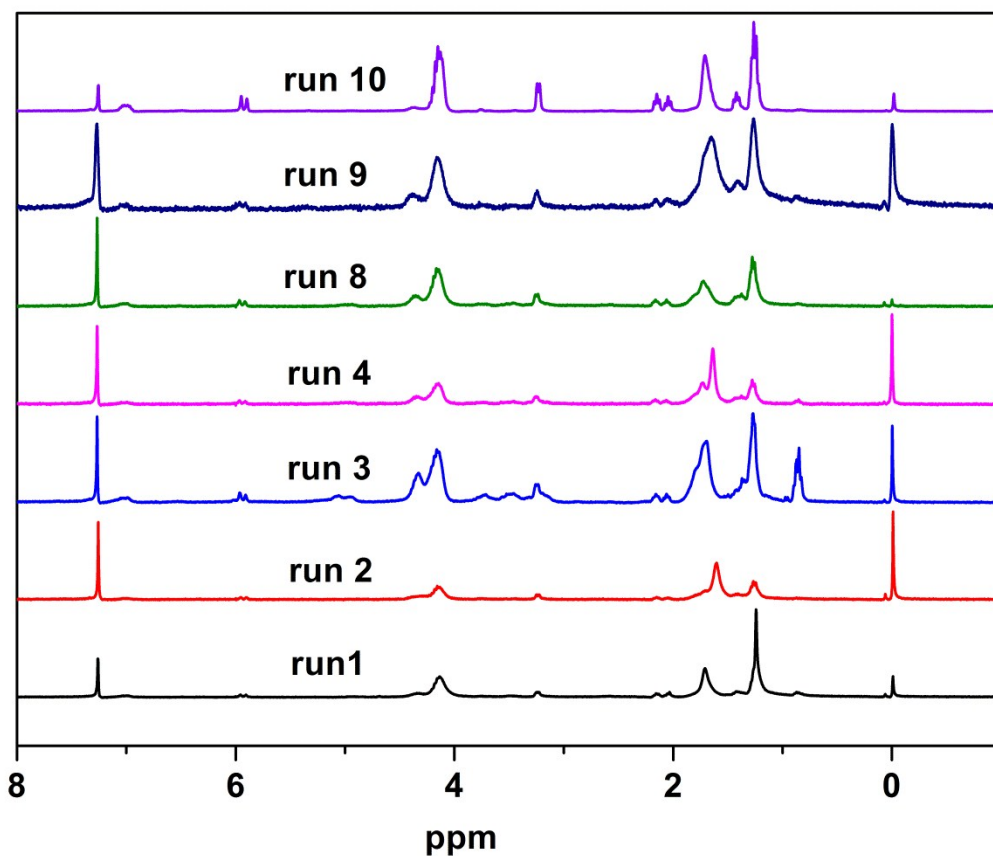

Figure S2.  $^1\text{H-NMR}$  spectrum of the oligomers (run 1 to run 10).

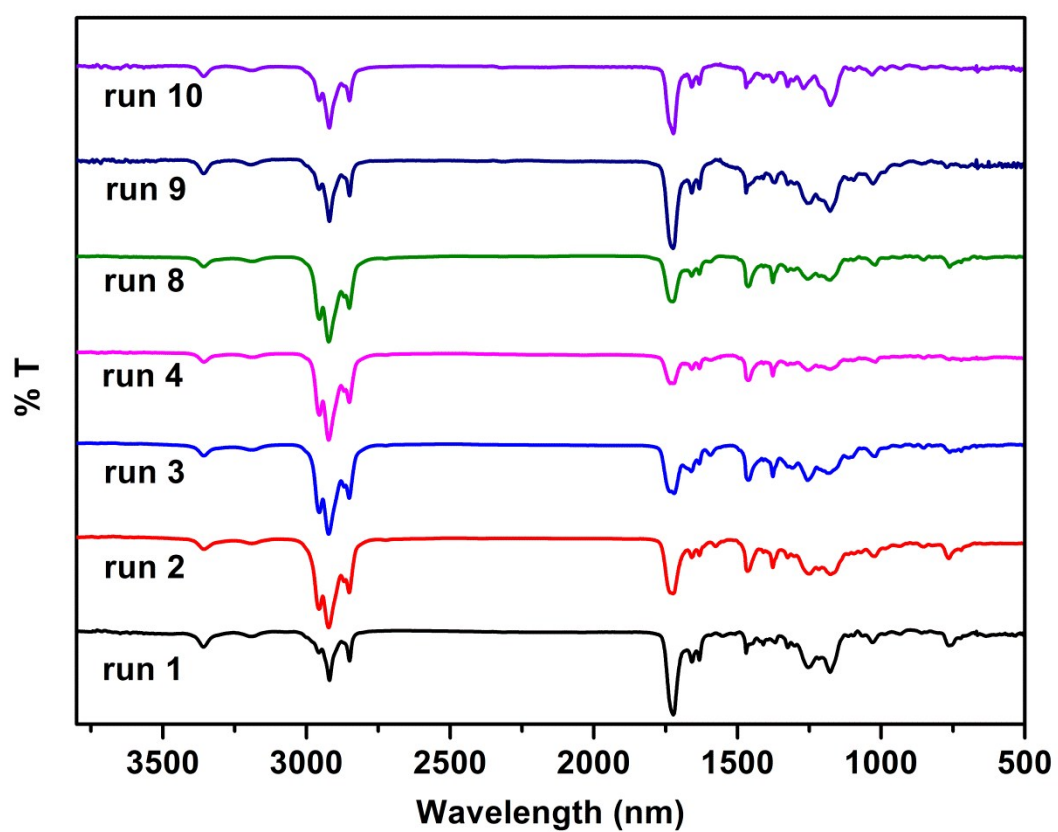

Figure S3. FT-IR spectrum of the oligomers (run 1 to run 10).

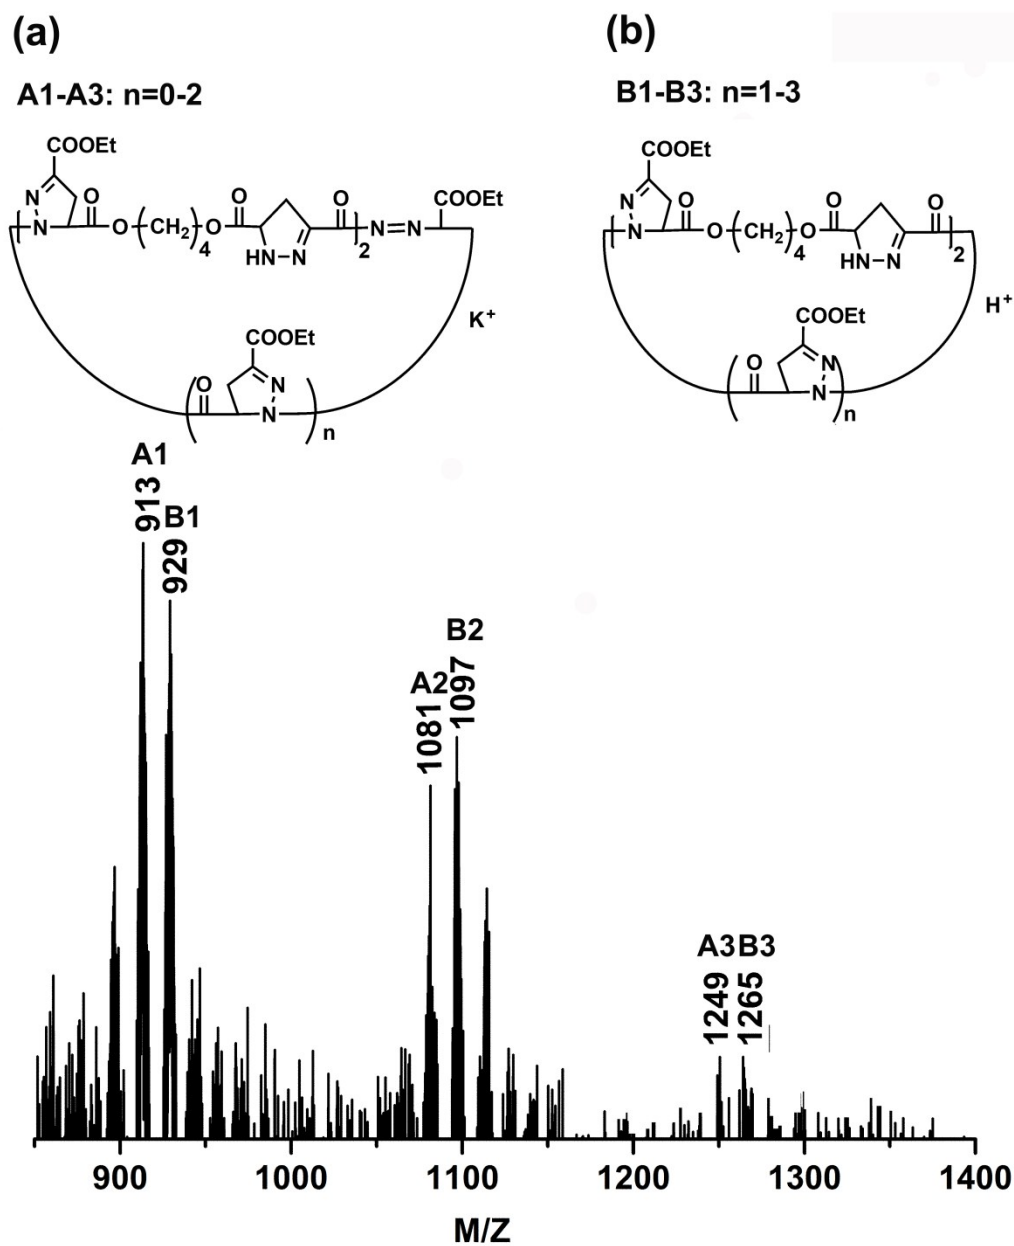

Figure S4. MALDI-TOF-MS spectra of the oligomer (run 11).

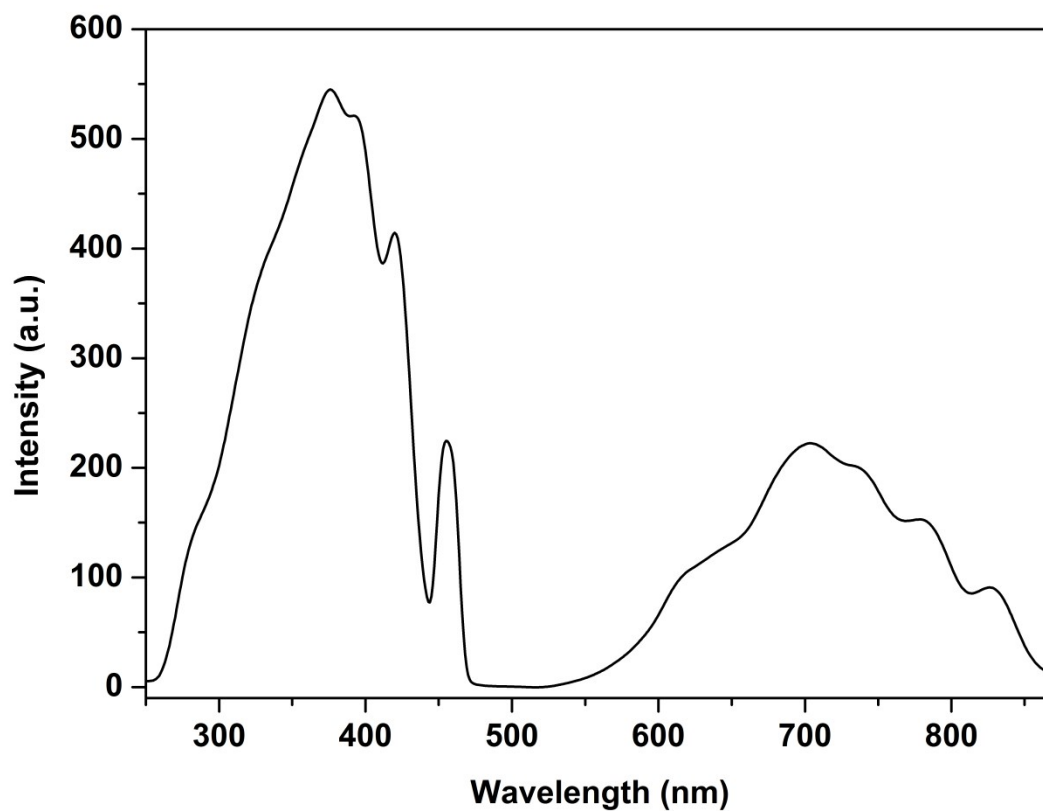

Figure S5. The excitation spectra of oligomer (run 11).

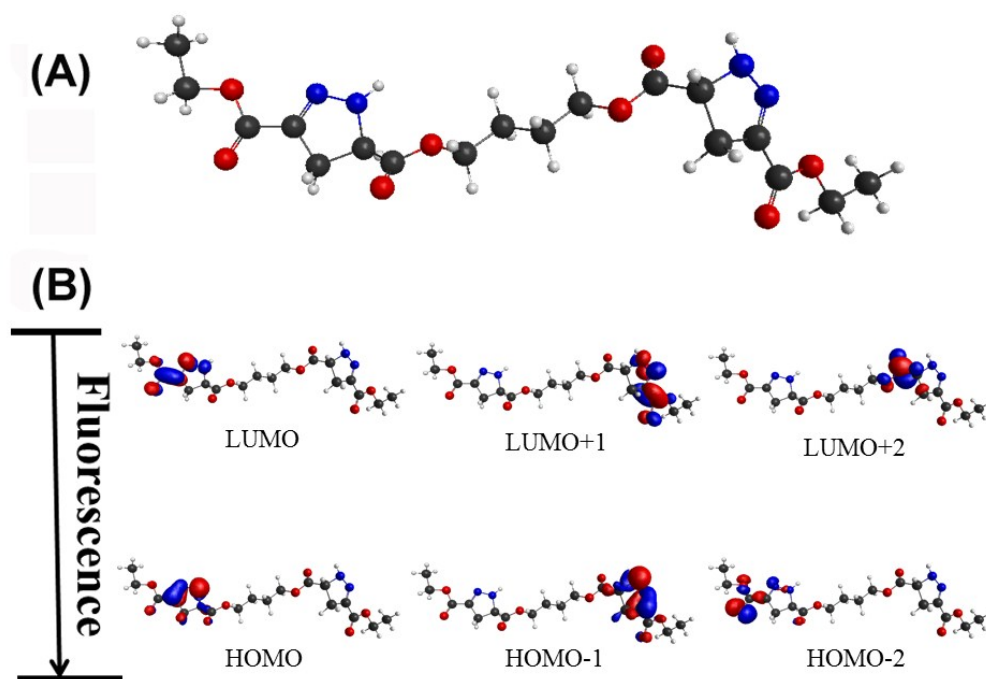

Figure S6. (a) The optimized geometry and (b) molecular orbitals of the BBP.

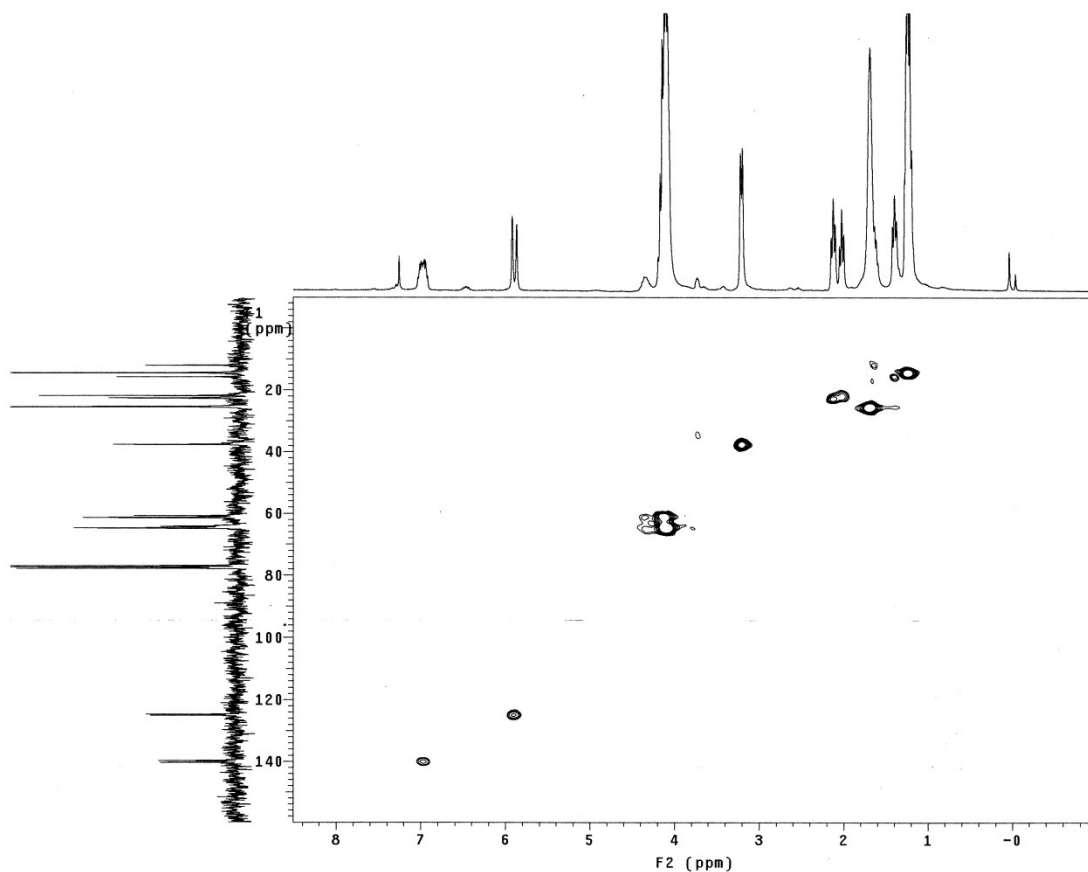

**Figure S7.** HSQC spectrum of the oligomer (run 11).

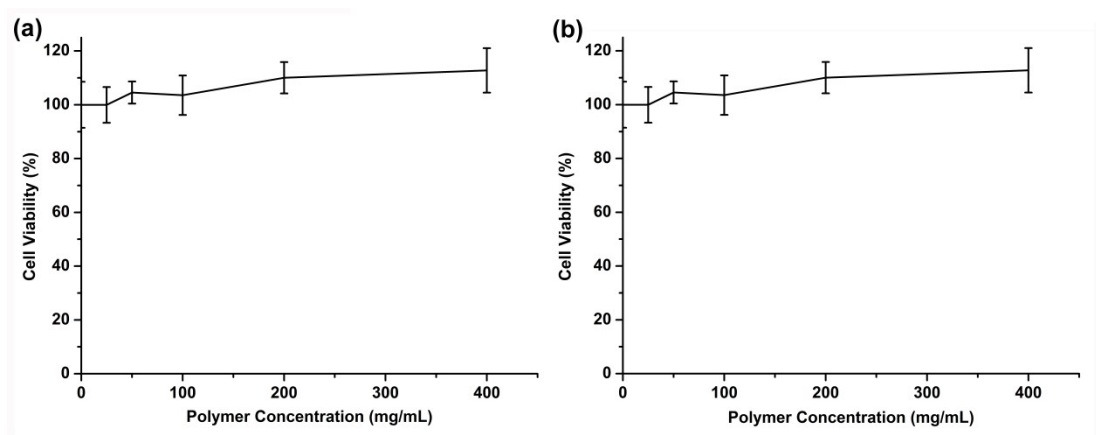

**Figure S8.** Cytotoxicity of the oligomer (run 11) in Cos7 cells (a) and HeLa cells (b).

**Cytotoxicity Assay.** Cell viability was determined by using a standard 3-(4, 5-dimethyl-2-thiazolyl)-2, 5-diphenyl-2-H-tetrazolium bromide (MTT) assay. Cells (Cos7 and HeLa cells) were seeded in 96-well plates at a concentration of  $5 \times 10^3$  cells/well in a final volume of 200  $\mu$ L and incubated for 24 h. The cells were then incubated with oligomers (run 11) dissolved in complete cell culture medium at final concentrations of 0, 25, 50, 100, 200 and 400  $\mu$ g/mL. After 48 h incubation, 20  $\mu$ L of MTT (5 mg/mL, Sigma) solution was added to each well and incubated for 4 h at 37  $^{\circ}$ C with 5%  $\text{CO}_2$ . The supernatant was then removed, and the cells treated with 200  $\mu$ L of dimethyl sulfoxide (DMSO, Sinopharm, China), followed by gently shaking. The

plates were analyzed at a wavelength of 570 nm on a microplate reader (TECAN, SPARK 10M, Austria). The data was presented as cell viability (%) = Experimental group/Negative control group × 100%.
